# Supplementary material for: ExaCT: automatic extraction of clinical trial characteristics from journal publications
Source: Springer Nature journal article supplement (doi:10.1186/1472-6947-10-56), 2010-09-28
Supplement: 12911_2009_357_MOESM2_ESM.pdf [file 12911_2009_357_MOESM2_ESM.pdf]

**Background** Attacks of wheezing induced by upper respiratory viral infections are common in preschool children between the ages of 10 months and 6 years. A short course of oral prednisolone is widely used to treat preschool children with wheezing who present to a hospital, but there is conflicting evidence regarding its efficacy in this age group.

**Methods** We conducted a randomized, double-blind, placebo-controlled trial comparing a 5-day course of oral prednisolone (10 mg once a day for children 10 to 24 months of age and 20 mg once a day for older children) with placebo in 700 children between the ages of 10 months and 60 months. The children presented to three hospitals in England with an attack of wheezing associated with a viral infection; 687 children were included in the intention-to-treat analysis (343 in the prednisolone group and 344 in the placebo group). The primary outcome was the duration of hospitalization. Secondary outcomes were the score on the Preschool Respiratory Assessment Measure, albuterol use, and a 7-day symptom score.

**Results** There was no significant difference in the duration of hospitalization between the placebo group and the prednisolone group (13.9 hours vs. 11.0 hours; ratio of geometric means, 0.90; 95% confidence interval, 0.77 to 1.05) or in the interval between hospital admission and signoff for discharge by a physician. In addition, there was no significant difference between the two study groups for any of the secondary outcomes or for the number of adverse events.

**Conclusions** In preschool children presenting to a hospital with mild-to-moderate wheezing associated with a viral infection, oral prednisolone was not superior to placebo. (Current Controlled Trials number, ISRCTN58363576 [controlled-trials.com] .)

## Trial design template:

|                                         |                                                                                                                                                                                                                                     |
|-----------------------------------------|-------------------------------------------------------------------------------------------------------------------------------------------------------------------------------------------------------------------------------------|
| <b>Eligibility criteria</b>             | <ul style="list-style-type: none"><li>• children between the ages of 10 months and 60 months;</li><li>• the children presented to three hospitals in England with an attack of wheezing associated with a viral infection</li></ul> |
| <b>Sample size</b>                      | 700                                                                                                                                                                                                                                 |
| <b>Start date of enrolment</b>          |                                                                                                                                                                                                                                     |
| <b>End date of enrolment</b>            |                                                                                                                                                                                                                                     |
| <b>Name of experimental treatment</b>   | prednisolone                                                                                                                                                                                                                        |
| <b>Name of control treatment</b>        | placebo                                                                                                                                                                                                                             |
| <b>Dose</b>                             | <ul style="list-style-type: none"><li>• 10 mg for children 10 to 24 months of age</li><li>• 20 mg for older children</li></ul>                                                                                                      |
| <b>Frequency of treatment</b>           | once a day                                                                                                                                                                                                                          |
| <b>Route of treatment</b>               | oral                                                                                                                                                                                                                                |
| <b>Duration of treatment</b>            | 5-day                                                                                                                                                                                                                               |
| <b>Primary outcome name</b>             | the duration of hospitalization                                                                                                                                                                                                     |
| <b>Primary outcome time point</b>       |                                                                                                                                                                                                                                     |
| <b>Secondary outcome name</b>           | <ul style="list-style-type: none"><li>• the score on the Preschool Respiratory Assessment Measure;</li><li>• albuterol use;</li><li>• a 7-day symptom score</li></ul>                                                               |
| <b>Secondary outcome time point</b>     | 7-day                                                                                                                                                                                                                               |
| <b>Funding organization name</b>        |                                                                                                                                                                                                                                     |
| <b>Funding number</b>                   |                                                                                                                                                                                                                                     |
| <b>Early stopping</b>                   |                                                                                                                                                                                                                                     |
| <b>Registration identifier of trial</b> | ISRCTN58363576                                                                                                                                                                                                                      |
| <b>Author name</b>                      | Panickar J                                                                                                                                                                                                                          |
| <b>Date of publication</b>              | 2009 Jan 22                                                                                                                                                                                                                         |
| <b>DOI</b>                              |                                                                                                                                                                                                                                     |
